# Supplementary material for: Molecular Epidemiology and Characteristics of CTX-M-55 Extended-Spectrum β-Lactamase-Producing Escherichia coli From Guangzhou, China
Source: Front Microbiol. 2021 Oct 11;12:730012. doi: 10.3389/fmicb.2021.730012 (PMC8542904; doi:10.3389/fmicb.2021.730012)
Supplement: Supplementary file 1 [file Data_Sheet_1.xlsx]

## Sheet: Sheet1
Supplementary Table S1: Primer sequences
Prime		Sequence	Size (bp)	Tm (℃)
Plasmid replicon	IncI1-F	CGAAAGCCGGACGGCAGAA	142	58
	IncI1-R	TCGTCGTTCCGCCAAGTTCGT
	IncFII-F	CTGATCGTTTAAGGAATTTT	258-262	54
	IncFII-R	CACACCATCCTGCACTTA
	IncFIA-F	CCATGCTGGTTCTAGAGAAGGTG	462	60
	IncFIA-R	GTATATCCTTACTGGCTTCCGCAG
	IncFIB-F	GGAGTTCTGACACACGATTTTCTG	702	60
	IncFIB-R	CTCCCGTCGCTTCAGGGCATT
	IncFIC-F	GTGAACTGGCAGATGAGGAAGG	262	60
	IncFIC-R	TTCTCCTCGTCGCCAAACTAGAT
	IncHI2-F	GGAGCGATGGATTACTTCAGTAC	471	60
	IncHI2-R	TGCCGTTTCACCTCGTGAGTA
	IncA/C-F	GAGAACCAAAGACAAAGACCTGGA	465	60
	IncA/C-R	ACGACAAACCTGAATTGCCTCCTT
	CTX-M-1-group-F	CAGCGCTTTTGCCGTCTAAG	943	63
	CTX-M-1-group-R	GGCCCATGGTTAAAATCACTGC
	TEM-F	CATTTCCGTGTCGCCCTTATTC	800	52
	TEM-R	CGTTCATCCATAGTTGCCTGAC
	qnrS-F	GCAAGTTCATTGAACAGGGT	428	56
	qnrS-R	TCTAAACCGTCGAGTTCGGCG
	oqxAB-F	CCGCACCGATAAATTAGTCC	313	56
	oqxAB-R	GGCGAGGTTTTGATAGTGGA
	mph(A)-F	GTGAGGAGGAGCTTCGCGAG	403	56
	mph(A)-R	TGCCGCAGGACTCGGAGGTC
	erm(B)-F	GAAAAAGTACTCAACCAAATA	639	45
	erm(B)-R	AATTTAAGTACCGTTACT
	tet(A)-F	GCTACATCCTGCTTGCCTTC	210	55
	tet(A)-R	CATAGATCGCCGTGAAGAGG
	tet(B)-F	TTGGTTAGGGGCAAGTTTTG	659	55
	tet(B)-R	GTAATGGGCCAATAACACCG
	aac(6')-Ib-F	ATGACTGAGCATGACCTTGC	519	52
	aac(6')-Ib-R	TTAGGCATCACTGCGTGTTC
	aph(3')-Ⅱ-F	ATCCCCGGGAAAACAGCATT	365	52
	aph(3')-Ⅱ-R	CGTCCAACATCAATACAACC
	aadA1-F	GGAGAATGGCAGCGCAAT	269	52
	aadA1-R	GTTACTGCGCTGTACCAAT
	cmlA-F	CCGCCACGGTGTTGTTGTTATC	698	55
	cmlA-R	CACCTTGCCTGCCCATCATTAG
	catA-F	TCGGCACAAATACAGGGGTC	640	57
	catA-R	AGTGCGGAGAATGTTTCGGT
	sul1-F	CTTCGATGAGAGCCGGCGGC	437	65
	sul1-R	GCAAGGCGGAAACCCGCGCC
	sul2-F	GCGCTCAAGGCAGATGGCATT	285	70
	sul2-R	GCGTTTGATACCGGCACCCGT
	sul3-F	AGATGTGATTGATTTGGGAGC	443	60
	sul3-R	TAGTTGTTTCTGGATTAGAGCCT
	drfA14-F	CGATAAGTGGAGCGTAGAGG	157	57
	drfA14-R	CTCAGGTTGGACATCAAATG
	drfA17-F	CGTAATCGGTAGTGGTCCTG	127	57
	drfA17-R	TGGAAGAACACCCATAGAGTC
	fosA-F	ATCTGTGGGTCTGCCTGTCGT	271	52
	fosA-R	ATGCCCGCATAGGGCTTCT
	floR-F	TATCTCCCTGTCGTTCCAG	399	53
	floR-R	AGAACTCGCCGATCAATG
	rmtB-F	ACATCAACGATGCCCTCAC	724	56
	rmtB-R	AAGTTCTGTTCCGATGGTC

## Sheet: Sheet2
Supplementary Table S2: The Characteristics of Isolates Carrying the blaCTX-M-55 Gene
Isolates	ST	Collection Date	Sourinece	No.of plasmids	Plasmid	Location of blaCTX-M-55	Plasmids of transconjugant
13	1193	2016-12-26	urine	3	IncFIA,IncFIB,IncI1	IncI1	N
26	1193	2017-01-07	wound secretion	3	IncFIA,IncFIB,IncI1	IncI1	N
48	1193	2015-12-23	sputum	4	IncFIA,IncFIB,IncI1,IncI2	IncI1	IncI1
105	1193	2013-09-09	urine	3	IncFIA,IncFIB,IncI1	IncI1	IncI1
139	1193	2014-03-19	urine	3	IncFIA,IncFIB,IncI1	IncI1	IncI1
859	1193	2012-12-09	urine	3	IncFIA,IncFIB,IncI1	IncI1	N
N16	1193	2020-06-22	urine	3	IncFIA,IncFIB,IncI1	IncI1	IncI1
N26	1193	2020-06-14	purulent secretion	3	IncFIA,IncFIB,IncI1	IncI1	IncI1
N33	1193	2020-06-15	purulent secretion	3	IncFIA,IncFIB,IncI1	IncI1	N
N78	1193	2020-08-13	urine	3	IncFIA,IncFIB,IncI1	IncI1	IncI1
N92	1193	2020-08-23	urine	4	IncFIA,IncFIB,IncI1,IncQ1	IncI1	IncI1
N88	1193	2020-07-27	urine	3	IncFIA,IncFIB,IncFII	IncFII	N
60	1193	2016-12-03	urine	2	IncFIA,IncFIB	Chromosome	N
N4	1193	2020-06-22	sputum	2	IncFIA,IncFIB	Chromosome	N
N44	1193	2020-06-27	urine	2	IncFIA,IncFIB	Chromosome	N
N64	1193	2020-07-22	blood	2	IncFIA,IncFIB	Chromosome	N
N71	1193	2020-08-20	urine	2	IncFIA,IncFIB	Chromosome	N
176	648	2015-09-16	urine	2	IncFII,IncFIC	IncFII	N
177	648	2015-09-28	urine	2	IncFII,IncFIC	IncFII	IncFII,IncFIC
179	648	2015-07-03	blood	2	IncFII,IncFIC	IncFII	IncFII
184	648	2015-07-24	blood	2	IncFII,IncFIC	IncFII	IncFII,IncFIC
N30	648	2020-06-20	urine	4	IncFIA,IncFIB,IncFIB,IncFIC	IncFIB	N
N85	648	2020-08-01	purulent secretion	4	IncFIA,IncFIB,IncFIB,IncFIC	IncFIB	N
96	648	2012-10-01	urine	4	IncFIA,IncFIB,IncFII,IncI1	IncI1	IncI1
38	38	2015-04-10	urine	2	IncFIC,IncFIB	IncFIC	N
44	38	2015-09-17	purulent secretion	0		Chromosome	N
52	38	2016-12-16	urine	2	IncFIC,IncFIB	IncFIC	N
182	38	2015-07-05	urine	4	IncFIB,IncFIC,IncFII,IncP1	IncFIC	IncFII, IncFIB,IncFIC
92	38	2014-04-28	sputum	5	IncFIA,IncFIB,IncFIC,IncFII,IncI1	IncI1	IncI1
N52	38	2020-06-25	urine	3	IncB/O/K/Z,IncFIB,IncI1	IncFIB	N
50	155	2017-01-16	urine	6	IncFIB,IncFII,IncFII,IncHI2A,IncHI2,IncN	IncHI2	N
N58	155	2020-06-28	blood	4	IncFIB,IncFIC,IncHI2A,IncHI2	IncHI2	N
115	155	2013-05-23	urine	3	IncFIB,IncFIC,IncFII	IncFII	IncFII
150	155	2015-03-13	purulent secretion	4	IncFIB,IncFIB,IncFIC,IncI1	IncFIC	IncFIC, IncFIB
N46	155	2020-06-30	urine	6	IncFIB,IncFIC,IncFII,IncHI2A,IncHI2,IncQ1	IncHI2 and IncFII	N
N99	155	2020-07-21	abdominal drainage fluid	1	IncI1	IncI1	N
N65	457	2020-07-27	urine	8	IncFIA,IncFIA,IncFIB,IncFIB,IncFIC,IncFII,IncHI1A,IncHI1B,IncI1	IncFIB	IncFIB
N87	457	2020-08-23	purulent secretion	4	IncFIA,IncFIB,IncFIB,IncFIC	IncFIB	N
23	457	2016-07-20	wound secretion	4	IncFIC,IncFIB,IncX3,IncX4	IncFIC	N
225	457	2014-07-07	urine	4	IncFIB,IncFIC,IncFII,IncI1	IncI1	N
8	2003	2017-04-20	blood	4	IncFIA,IncFIB,IncFII,IncFII	IncFII	IncFII
15	2003	2016-01-19	purulent secretion	3	IncFIC,IncFIB,IncFII	IncFII	N
199	2003	2014-11-06	urine	4	IncFIB,IncFIC,IncQ1,IncX1	IncFII	N
837	2003	2014-10-18	blood	5	IncFII,IncFIC,IncI2,IncN,IncX1	IncFII	IncFII
75	12285	2016-01-18	urine	3	IncFII,IncFIB,IncI1	Chromosome and IncI1	IncI1
128	12285	2014-07-29	urine	3	IncFIB,IncFII,IncI1	Chromosome and IncI1	IncI1
173	12285	2015-02-03	urine	3	IncFIB,IncFIC,IncI1	Chromosome and IncI1	IncFIB,IncI1
N75	12285	2020-08-07	wound secretion	3	IncFIB,IncFII,IncI1	IncI1	N
N23	131	2020-05-30	sputum	3	IncFIB,IncFIC,IncX1	IncI1	IncI1
N94	131	2020-08-04	urine	5	IncFIB,IncFII,IncI1,IncX3	IncI1	N
N66	131	2020-08-19	urine	2	IncB/O/K/Z,IncFII	IncFII	IncFII
133	131	2014-03-01	urine	3	IncFIB,IncFIC,IncI1	Chromosome	N
156	101	2015-08-07	urine	3	IncFIA,IncFIB,IncFIC	IncFIC	N
833	101	2015-08-07	blood	3	IncFIA,IncFIB,IncFIC	IncFIC	N
114	101	2013-12-02	abdominal drainage fluid	8	IncFIA,IncFIB,IncFIC,IncFII,IncFII,IncI1,IncP1,IncX1	IncFII	IncFII
141	162	2014-07-29	blood	1	IncFII	IncFII	IncFII
167	162	2015-08-30	urine	3	IncFIB,IncFIC,IncFII	IncFII	IncFII
190	162	2015-11-09	urine	3	IncFIB,IncFIC,IncFII	IncFII	IncFII
110	224	2013-10-12	sputum	2	IncFIB,IncFIC	IncFIC	N
N2	224	2020-05-26	urine	3	IncI1,IncX1,IncY	IncX/Y	N
N45	224	2020-07-16	urine	3	IncFIB,IncFIB,IncFII	IncFII	N
66	5150	2017-01-13	purulent secretion	2	IncFII,IncFIB	IncFII	N
858	5150	2013-06-01	wound secretion	2	IncFIB,IncFII	IncFII	IncFII
121	5150	2013-12-05	urine	2	IncFII,IncFIB	Chromosome	N
N17	410	2020-06-07	urine	3	IncFIB,IncFIC,IncX1	IncFIC	N
N42	410	2020-07-01	urine	5	IncFIA,IncFIB,IncFIC,IncI1,IncX4	IncI1	N
30	617	2017-07-01	urine	6	IncFIC,IncFIB,IncFII,IncI2,IncQ1,IncX3	IncFII	IncFII
851	617	2014-06-04	urine	6	IncFIA,IncFIB,IncFII,IncR,IncX,IncY	IncFII	IncFII
90	69	2012-11-07	urine	3	IncFII,IncFIB,IncI1	IncI1	IncI1
91	69	2013-07-13	blood	3	IncFII,IncFIB,IncI1	IncI1	IncI1
97	95	2012-08-10	urine	3	IncFIB,IncFIC,IncI1	IncI1	IncI1
198	95	2014-05-31	sputum	3	IncFIB,IncFIC,IncI1	IncI1	IncI1
N56	10	2020-07-21	urine	5	IncFIA,IncFIB,IncFIC,IncI1,IncI2	IncI1	IncI1
N106	12	2020-07-27	sputum	4	IncFII,IncFIB,IncI1,IncX4	IncI1	IncI1
200	73	2016-03-14	wound secretion	3	IncFIB,IncFII,IncI1	IncI1	IncI1
122	58	2013-12-03	wound secretion	4	IncFIA,IncFIB,IncFIC,IncI1	IncI1	IncI1
117	12284	2013-09-05	urine	3	IncFIB,IncFIC,IncI1	IncI1	IncI1
47	12303	2016-07-05	blood	3	IncFIC,IncFIB,IncI1	IncI1	N
N39	1844	2020-07-04	blood	3	IncFIB,IncFIC,IncI1	IncI1	IncFIB,IncI1
126	23	2014-02-08	urine	3	IncFII,IncI1,IncQ1	IncFII	IncFII
N5	58	2020-06-12	wound secretion	4	IncFIA,IncFIB,IncFIC,IncFII	IncFII	IncFII
98	351	2012-04-24	urine	4	IncFIB,IncFIC,IncFII,IncX1	IncFII	N
N113	3944	2020-09-06	urine	3	IncFII,IncFIB,IncI1	IncFII	N
175	117	2015-05-31	wound secretion	3	IncFIB,IncFIC,IncI2	IncI2	N
496	70	2017-03-15	purulent secretion	2	IncFIB,IncFIC	IncFIC	N
N47	226	2020-06-26	urine	2	IncHI2A,IncHI2	IncHI2	N
N18	354	2020-06-09	urine	2	IncFIB,IncFIC	Chromosome and IncFIC	IncFIB,IncFIC
45	405	2015-08-01	sputum	4	IncFIC,IncFIB,IncQ1,IncB/O/K/Z	Chromosome and IncFIC	IncFIC
70	4978	2016-11-01	blood	2	IncFIB,IncY	IncFIB	IncFIB
N indicates that no transconjugant carrying blaCTX-M-55 was obtained.

## Sheet: Sheet3
Supplementary Table S3: The Drug Sensitivity Characteristics of blaCTX-M-55-positive Isolates and Transconjugants
Isolates	CRO	CAZ	FEP	AMC	TZP	IPM	ETP	LVX	AMK	SXT	Resistance gene carried by isolates
C600	<=0.25	0.5	<=0.12	4	<=4	<=0.25	<=0.125	0.5	<=2	<=20
13	>=64	16	8	4	<=4	<=0.25	<=0.125	>=8	<=2	>=320	aac(3)-IId,aadA5,aph(3'')-Ib,aph(6)-Id,blaCTX-M-55,blaTEM-1,dfrA17,mph(A),sul1,sul2,tet(A)
26	>=64	32	16	4	<=4	<=0.25	<=0.125	>=8	<=2	>=320	aac(3)-IId,aadA5,aph(3'')-Ib,aph(6)-Id,blaCTX-M-55,blaTEM-1,dfrA17,mph(A),sul1,sul2,tet(A)
48	>=64	>=64	>=32	16	<=4	<=0.25	<=0.125	>=8	<=2	<=20	aac(3)-IId,blaCTX-M-55,blaTEM-1,mcr-1
C600-48	>=64	>=64	16	16	<=4	<=0.25	<=0.125	0.5	<=2	<=20	blaCTX-M-55
105	>=64	>=64	16	4	<=4	<=0.25	<=0.125	>=8	4	<=20	blaCTX-M-55
C600-105	>=64	>=64	16	4	<=4	<=0.25	<=0.125	0.5	<=2	<=20	blaCTX-M-55
139	>=64	>=64	4	8	<=4	<=0.25	<=0.125	>=8	<=2	>=320	aadA5,blaCTX-M-55,blaTEM-1,dfrA17,mph(A),sul1,sul2
C600-139	>=64	>=64	1	8	<=4	<=0.25	<=0.125	0.5	<=2	<=20	blaCTX-M-55
859	>=64	16	<=1		<=4	<=0.25	<=0.125	1	<=2	>=320	aac(3)-IId,aadA5,aph(3'')-Ib,aph(6)-Id,blaCTX-M-55,blaTEM-1,dfrA17,mph(A),sul1,sul2,tet(A)
N16	>=64	>=64	16	8	<=4	<=0.25	<=0.125	>=8	<=2	<=20	blaCTX-M-55,blaTEM-1
C600-N16	>=64	>=64	16	8	<=4	<=0.25	<=0.125	0.5	<=2	<=20	blaCTX-M-55
N26	>=64	>=64	16	8	<=4	<=0.25	<=0.125	>=8	<=2	<=20	blaCTX-M-55,blaTEM-1
C600-N26	>=64	>=64	16	8	<=4	<=0.25	<=0.125	0.5	<=2	<=20	blaCTX-M-55
N33	>=64	8	16	4	<=4	<=0.25	<=0.125	>=8	<=2	<=20	blaCTX-M-55,blaTEM-1
N78	>=64	>=64	>=32	8	<=4	<=0.25	<=0.125	>=8	<=2	>=320	aac(3)-IId,aadA5,aph(3'')-Ib,aph(6)-Id,blaCTX-M-55,blaTEM-1,dfrA17,mph(A),sul1,sul2,tet(A)
C600-N78	>=64	>=64	>=32	8	<=4	<=0.25	<=0.125	0.5	<=2	<=20	blaCTX-M-55
N92	>=64	>=64	16	4	<=4	<=0.25	<=0.125	4	<=2	<=20	aph(3'')-Ib,aph(6)-Id,blaCTX-M-55,sul2
C600-N92	>=64	>=64	16	4	<=4	<=0.25	<=0.125	0.5	<=2	<=20	blaCTX-M-55
N88	>=64	32	16	4	<=4	<=0.25	<=0.125	>=8	<=2	<=20	aph(3'')-Ib,aph(3')-IIa,aph(6)-Id,blaCTX-M-27,blaCTX-M-55,blaTEM-1,floR,qnrS1,sul2,tet(A)
60	>=64	8	4	4	<=4	<=0.25	<=0.125	>=8	4	>=320	aadA5,aph(3'')-Ib,aph(6)-Id,blaCTX-M-55,blaTEM-1,dfrA17,mph(A),sul1,sul2,tet(A)
N4	>=64	32	16		<=4	<=0.25	<=0.125	>=8	<=2	>=320	aac(3)-IId,aadA5,aph(3'')-Ib,aph(6)-Id,blaCTX-M-55,blaTEM-1,dfrA17,mph(A),sul1,sul2,tet(A)
N44	>=64	8	2	8	<=4	<=0.25	<=0.125	>=8	<=2	>=320	aac(3)-IId,aadA5,aph(3'')-Ib,aph(6)-Id,blaCTX-M-55,blaTEM-1,dfrA17,mph(A),sul1,sul2,tet(A)
N64	>=64	32	>=32	16	<=4	<=0.25	<=0.125	>=8	<=2	>=320	aac(3)-IId,aadA5,aph(3'')-Ib,aph(6)-Id,blaCTX-M-55,blaTEM-1,dfrA17,mph(A),sul1,sul2,tet(A)
N71	>=64	8	16	8	<=4	<=0.25	<=0.125	>=8	<=2	<=20	aac(3)-IId,blaCTX-M-55,blaTEM-1
176	>=64	16	16	8	<=4	<=0.25	<=0.125	1	4	>=320	aac(3)-IIa,aadA5,aph(3')-Ia,aph(3'')-Ib,aph(6)-Id,blaCTX-M-55,blaTEM-1,catA2,dfrA17,erm(B),mph(A),sul1,sul2,tet(34),tet(A)
177	>=64	16	16	16	<=4	<=0.25	<=0.125	>=8	<=2	>=320	aac(3)-IIa,aadA5,aph(3'')-Ib,aph(3')-Ia,aph(6)-Id,blaCTX-M-55,blaTEM-1,catA2,dfrA17,erm(B),mph(A),sul1,sul2,tet(34),tet(A)
C600-177	>=64	16	16	16	<=4	<=0.25	<=0.125	0.5	<=2	>=320	aph(3')-Ia,aadA5,blaCTX-M-55,blaTEM-1,dfrA17,erm(B),mph(A),tet(A)
179	>=64	>=64	>=32		<=4	<=0.25	<=0.125	4	<=2	>=320	aac(3)-IIa,aadA5,aph(3')-Ia,aph(3'')-Ib,aph(6)-Id,blaCTX-M-55,blaTEM-1,catA2,dfrA17,erm(B),mph(A),sul1,sul2,tet(34),tet(A)
C600-179	>=64	>=64	>=32	8	<=4	<=0.25	<=0.125	0.5	<=2	<=20	aph(3')-Ia,blaCTX-M-55,blaTEM-1
184	>=64	>=64	16	16	64	<=0.25	<=0.125	>=8	<=2	>=320	aac(3)-IIa,aadA5,aph(3'')-Ib,aph(3')-Ia,aph(6)-Id,blaCTX-M-55,blaTEM-1,catA2,dfrA17,erm(B),mph(A),sul1,sul2,tet(34),tet(A)
C600-184	>=64	>=64	16	16	<=4	<=0.25	<=0.125	0.5	<=2	>=320	aph(3')-Ia,aadA5,blaCTX-M-55,blaTEM-1,dfrA17,erm(B),mph(A),tet(A)
N30	>=64	32	>=32	8	<=4	<=0.25	<=0.125	1	<=2	>=320	aph(3'')-Ib,aph(6)-Id,blaCTX-M-55,blaTEM-1,dfrA14,sul2,tet(34),tet(A)
N85	>=64	32	>=32	8	<=4	<=0.25	<=0.125	1	<=2	>=320	aph(3'')-Ib,aph(6)-Id,blaCTX-M-55,blaTEM-1,dfrA14,sul2,tet(34)
96	>=64	>=64	16	4	<=4	<=0.25	<=0.125	>=8	<=2	<=20	aac(3)-IIa,aadA5,aph(3'')-Ib,aph(6)-Id,blaCTX-M-104,blaCTX-M-55,blaTEM-1,dfrA17,erm(B),floR,mph(A),sul1,sul2,tet(34),tet(A),tet(B)
C600-96	>=64	>=64	16	4	<=4	<=0.25	<=0.125	0.5	<=2	<=20	blaCTX-M-55
38	>=64	16	8		<=4	<=0.25	<=0.125	1	<=2	<=20	aph(3'')-Ib,aph(6)-Id,blaCTX-M-55,blaTEM-1,catA1,dfrA7,erm(B),mph(A),sul1,sul2,tet(D)
44	>=64	32	>=32	16	<=4	<=0.25	<=0.125	1	<=2	<=20	aph(3'')-Ib,aph(6)-Id,blaCTX-M-55,blaTEM-1,catA1,floR,sul2,tet(A),tet(D)
52	>=64	8	16	8	<=4	<=0.25	<=0.125	1	<=2	<=20	blaCTX-M-55,catA1,erm(B),mph(A)
182	>=64	>=64	16	4	<=4	<=0.25	<=0.125	1	<=2	<=20	aph(3'')-Ib,aph(6)-Id,blaCTX-M-55,blaTEM-1,catA1,dfrA7,erm(B),mph(A),sul1,sul2,tet(D)
C600-182	>=64	>=64	16	4	<=4	<=0.25	<=0.125	0.5	<=2	<=20	blaCTX-M-55,blaTEM-1,dfrA7,erm(B),mph(A)
92	>=64	>=64	16	8	<=4	<=0.25	<=0.125	<=0.25	<=2	<=20	aph(3'')-Ib,aph(6)-Id,blaCTX-M-27,blaCTX-M-55,blaTEM-1,mph(A),sul2,tet(A)
C600-92	>=64	>=64	16	8	<=4	<=0.25	<=0.125	0.5	<=2	<=20	blaCTX-M-55
N52	>=64	>=64	>=32	16	>=128	<=0.25	<=0.125	<=0.25	<=2	<=20	blaCTX-M-55,sul2
50	>=64	8	8	8	8	<=0.25	<=0.125	>=8	<=2	>=320	aac(3)-IId,aadA1,aph(3')-Ia,aph(6)-Id,arr-2,blaCTX-M-55,blaLAP-2,blaTEM-1,dfrA1,dfrA14,floR,mph(A),qnrS1,sul1,sul3,tet(34),tet(A)
N58	>=64	32	>=32	8	<=4	<=0.25	<=0.125	>=8	<=2	>=320	aac(3)-IVa,aadA1,aadA2,aph(3')-Ia,aph(3'')-Ib,aph(4)-Ia,aph(6)-Id,arr-2,blaCTX-M-55,blaOXA-10,blaTEM-1,cmlA5,dfrA14,floR,lnu(F),qnrS1,sul2,sul3,tet(34),tet(A)
115	>=64	>=64	8	8	<=4	<=0.25	<=0.125	>=8	<=2	<=20	blaCTX-M-55,tet(34),tet(B)
C600-115	>=64	>=64	8	8	<=4	<=0.25	<=0.125	0.5	<=2	<=20	blaCTX-M-55,tet(B)
150	>=64	32	16	8	<=4	<=0.25	<=0.125	>=8	<=2	<=20	aac(3)-IIa,blaCTX-M-55,catA8,dfrE,erm(B),lsa(A),tet(34),tet(M)
C600-150	>=64	32	16	8	<=4	<=0.25	<=0.125	0.5	<=2	<=20	blaCTX-M-55,catA8,erm(B)
N46	>=64	32	>=32	16	8	<=0.25	<=0.125	>=8	<=2	>=320	aac(3)-IId,aadA22,aph(3')-Ia,aph(3'')-Ib,aph(6)-Id,arr-2,blaCTX-M-55,blaLAP-2,blaTEM-1,catA1,catA2,dfrA14,floR,lnu(F),mph(A),qnrS1,sul2,sul3,tet(34),tet(A),tet(B)
N99	>=64	32	16		<=4	<=0.25	<=0.125	<=0.25	<=2	<=20	blaCTX-M-55,tet(34)
N65	>=64	>=64	>=32	>=32	>=128	<=0.25	<=0.125	>=8	<=2	>=320	aadA1,aadA2,blaCTX-M-55,blaTEM-1,cmlA1,dfrA12,floR,lnu(G),oqxA,oqxB,qnrS1,sul2,tet(34),tet(A),tet(M),tet(X)
C600-N65	>=64	>=64	16	4	<=4	<=0.25	<=0.125	0.5	<=2	<=20	blaCTX-M-55
N87	>=64	>=64	>=32	>=32	>=128	<=0.25	<=0.125	>=8	<=2	>=320	aadA1,aadA2,aph(3')-Ia,blaCTX-M-55,blaTEM-1,cmlA1,dfrA12,floR,oqxA,oqxB,sul2,tet(34),tet(A),tet(M)
23	>=64	>=64	>=32	16	<=4	<=0.25	<=0.125	>=8	<=2	<=20	aph(3')-Ia,blaCTX-M-55,tet(34),tet(A)
225	>=64	16	>=32		<=4	<=0.25	<=0.125	>=8	>=64	>=320	aadA1,aadA2,blaCTX-M-27,blaCTX-M-55,blaTEM-135,cmlA1,dfrA12,floR,rmtB1,sul2,tet(34),tet(M)
8	>=64	32	16	16	8	<=0.25	<=0.125	>=8	<=2	<=20	aph(3'')-Ib,aph(6)-Id,blaCTX-M-55,blaTEM-1,blaTEM-1,blaEC-8,blaTEM-1,fosA3,floR,sul2,tet(A)
C600-8	>=64	32	8	8	<=4	<=0.25	<=0.125	0.5	<=2	<=20	blaCTX-M-55,blaTEM-1,fosA3
15	>=64	16	8	4	<=4	<=0.25	<=0.125	>=8	<=2	>=320	aac(3)-IIa,aadA5,aph(3'')-Ib,aph(3')-IIa,aph(6)-Id,blaCTX-M-55,blaTEM-1,dfrA14,dfrA17,erm(B),floR,mph(A),sul1,sul2,tet(A)
199	>=64	16	8		<=4	<=0.25	<=0.125	>=8	<=2	>=320	aac(3)-IIa,aadA5,aph(3'')-Ib,aph(3')-IIa,aph(6)-Id,blaCTX-M-55,blaTEM-1,dfrA14,dfrA17,floR,mph(A),sul1,sul2,tet(A)
837	>=64	>=64	>=32	>=32	>=128	<=0.25	<=0.125	>=8	<=2	>=320	aac(3)-IIa,aph(3'')-Ib,aph(3')-IIa,aph(6)-Id,blaCTX-M-55,blaTEM-1,dfrA14,erm(B),floR,rmtB1,sul2,tet(A)
C600-837	>=64	>=64	16	>=32	8	<=0.25	<=0.125	0.5	<=2	<=20	aph(3')-IIa,blaCTX-M-55,blaTEM-1,erm(B),tet(A)
75	>=64	>=64	>=32	16	<=4	<=0.25	<=0.125	>=8	<=2	<=20	aac(3)-IId,aph(3'')-Ib,aph(6)-Id,blaCTX-M-55,blaTEM-1,mph(A),sul1,sul2,tet(A)
C600-75	>=64	>=64	16	16	<=4	<=0.25	<=0.125	0.5	<=2	<=20	blaCTX-M-55
128	>=64	>=64	16	4	<=4	<=0.25	<=0.125	>=8	<=2	>=320	aac(3)-IId,aadA5,aph(3'')-Ib,aph(6)-Id,blaCTX-M-55,blaTEM-1,dfrA17,mph(A),sul1,sul2,tet(A)
C600-128	>=64	>=64	16	4	<=4	<=0.25	<=0.125	0.5	<=2	<=20	blaCTX-M-55
173	>=64	>=64	32		<=4	<=0.25	<=0.125	>=8	<=2	>=320	aac(3)-IId,aph(3'')-Ib,aph(3')-Ia,aph(6)-Id,blaCTX-M-55,blaTEM-150,dfrA14,floR,sul2,sul3,tet(A)
C600-173	>=64	>=64	16	8	<=4	<=0.25	<=0.125	0.5	<=2	>=320	blaCTX-M-55,blaTEM-150,dfrA14
N75	>=64	>=64	>=32	16	8	<=0.25	<=0.125	>=8	<=2	>=320	aac(3)-IId,aph(3'')-Ib,aph(6)-Id,blaCTX-M-55,blaTEM-1,mph(A),sul1,sul2,tet(A)
N23	>=64	>=64	16	8	<=4	<=0.25	<=0.125	>=8	<=2	>=320	blaCTX-M-55
C600-N23	>=64	>=64	16	8	<=4	<=0.25	<=0.125	0.5	<=2	<=20	blaCTX-M-55
N94	>=64	32	16	8	<=4	<=0.25	<=0.125	>=8	<=2	<=20	aac(3)-IId,blaCTX-M-55,blaNDM-1,blaTEM-1
N66	>=64	>=64	16	16	<=4	<=0.25	<=0.125	1	<=2	>=320	aac(3)-IId,aadA5,blaCTX-M-14,blaCTX-M-55,blaTEM-1,dfrA17,fosA3,mph(A),sul1
C600-N66	>=64	>=64	16	4	<=4	<=0.25	<=0.125	0.5	<=2	<=20	blaCTX-M-55,blaTEM-1,fosA3
133	>=64	>32	>=32		<=4	<=0.25	<=0.125	1	<=2	<=20	blaCTX-M-55,blaTEM-235
156	>=64	>32	>=32		>64	<=0.25	<=0.125	>=8	8	>=320	aac(3)-IIa,aac(6')-Ib-cr,aph(3'')-Ib,aph(6)-Id,blaCTX-M-55,blaOXA-1,blaOXA-2,blaTEM-166,catA1,catB3,dfr7,sul1,tet(34),tet(A)
833	>=64	>32	8	<=2		<=0.25	<=0.125	<=0.25	<=2	>=320	aac(3)-IIa,aac(6')-Ib-cr,aph(3'')-Ib,aph(6)-Id,blaCTX-M-55,blaOXA-1,blaOXA-2,blaTEM-166,catA1,catB3,dfr7,sul1,tet(34),tet(A)
114	>=64	>=64	>=32	16	<=4	<=0.25	<=0.125	1	<=2	>=320	aac(3)-IId,aadA2,aadA22,aph(3'')-Ib,aph(6)-Id,blaCTX-M-55,blaTEM-1,dfrA14,erm(B),floR,lnu(F),mph(A),sul2,sul3,tet(34),tet(A)
C600-114	>=64	>=64	>=32	16	<=4	<=0.25	<=0.125	0.5	<=2	<=20	aph(3')-IId,blaCTX-M-55,blaTEM-1,mph(A),tet(A)
141	>=64	32	16	4	<=4	<=0.25	<=0.125	1	<=2	<=20	aph(3'')-Ib,aph(6)-Id,blaCTX-M-55,blaTEM-1,floR,fosA3,sul2,tet(34),tet(A)
C600-141	>=64	32	16	4	<=4	<=0.25	<=0.125	0.5	<=2	<=20	blaCTX-M-55,blaTEM-1,fosA3
167	>=64	>=64	>=32	8	<=4	<=0.25	<=0.125	>=8	4	<=20	aadA5,aph(3'')-Ib,aph(3')-IIa,aph(3')-Ia,aph(6)-Id,blaCTX-M-55,blaTEM-1,catA1,dfrA17,floR,mph(A),qnrS1,sul2,tet(34),tet(A),tet(B),tet(M)
C600-167	>=64	>=64	8	8	<=4	<=0.25	<=0.125	4	<=2	<=20	aph(3')-IIa,blaCTX-M-55,blaTEM-1,mph(A),qnrS1
190	>=64	32	16	4	<=4	<=0.25	<=0.125	>=8	<=2	>=320	aadA5,aph(3'')-Ib,aph(3')-IIa,aph(3')-Ia,aph(6)-Id,blaCTX-M-55,blaTEM-1,catA1,dfrA17,floR,mph(A),qnrS1,sul2,tet(34),tet(A),tet(B),tet(M)
C600-190	>=64	32	16	4	<=4	<=0.25	<=0.125	>=8	<=2	<=20	aph(3')-IIa,blaCTX-M-55,blaTEM-1,mph(A),qnrS1
110	>=64	64	64		<=4	<=0.25	<=0.125	>=8	<=2	>=320	aph(3'')-Ib,aph(6)-Id,blaCTX-M-55,blaTEM-1,dfrA17,floR,fosA3,oqxA,oqxB,sul2,tet(A)
N2	>=64	4	16	16	8	<=0.25	<=0.125	>=8	<=2	>=320	aadA1,aadA2,aph(3')-Ia,arr-2,blaCTX-M-55,blaOXA-10,blaTEM-1,cmlA1,dfrA12,dfrA14,floR,qnrS1,sul2,sul3,tet(A)
N45	>=64	8	16	8	<=4	<=0.25	<=0.125	>=8	>=64	>=320	aac(6')-Ib-cr,aadA16,aph(3')-IIa,arr-3,blaCTX-M-55,blaTEM-1,dfrA27,rmtB1,sul1,tet(A)
66	>=64	8	4			<=0.25	<=0.125	1		>=320	aac(3)-IId,aadA5,aph(3'')-Ib,aph(6)-Id,blaCTX-M-55,blaTEM-1,dfrA17,mph(A),sul1,sul2,tet(A)
858	>=64	16	8	16	<=4	<=0.25	<=0.125	1	<=2	>=320	aac(3)-IId,aadA5,aph(3'')-Ib,aph(6)-Id,blaCTX-M-55,blaTEM-1,dfrA17,mph(A),sul1,sul2,tet(A)
C600-858	>=64	4	8	16	<=4	<=0.25	<=0.125	0.5	<=2	<=20	aph(3'')-Ib,blaCTX-M-55,blaTEM-1,mph(A)
121	>=64	>=64	16	4	<=4	<=0.25	<=0.125	>=8	<=2	>=320	aac(3)-IId,aadA5,aph(3'')-Ib,aph(6)-Id,blaCTX-M-55,blaTEM-1,dfrA17,mph(A),sul1,sul2,tet(A)
N17	>=64	32	8	8	<=4	<=0.25	<=0.125	>=8	<=2	>=320	aac(3)-IIa,aadA1,aadA16,aph(3')-Ia,arr-3,blaCTX-M-55,dfrA27,floR,mph(A),sul1,sul3,tet(A)
N42	>=64	32	8	4	<=4	<=0.25	<=0.125	>=8	<=2	>=320	aadA1,aadA2,blaCTX-M-55,cmlA1,dfrA12,floR,sul2,tet(A),tet(M)
30	>=64	32	16	8	<=4	<=0.25	<=0.125	>=8	>=64	>=320	aac(3)-IId,aadA5,aph(3')-IIa,blaCTX-M-55,blaTEM-1,dfrA17,rmtB1,tet(34)
C600-30	>=64	32	16	8	<=4	<=0.25	<=0.125	<=0.25	>=64	>=320	blaCTX-M-55,aadA5,blaTEM-1,dfrA17,rmtB1
851	>=64	>=64	16	8	<=4	<=0.25	<=0.125	1	<=2	>=320	aadA2,aph(3'')-Ib,aph(6)-Id,blaCTX-M-55,blaTEM-1,dfrA12,floR,fosA3,rmtB1,sul1,sul2,tet(34),tet(A)
C600-851	>=64	>=64	16	8	<=4	<=0.25	<=0.125	0.5	<=2	<=20	blaCTX-M-55,blaTEM-1,fosA3
90	>=64	>=64	16	8	<=4	<=0.25	<=0.125	>=8	<=2	<=20	blaCTX-M-55,tet(A)
C600-90	>=64	>=64	16	8	<=4	<=0.25	<=0.125	1	<=2	<=20	blaCTX-M-55
91	>=64	>=64	16	16	<=4	<=0.25	<=0.125	1	<=2	<=20	blaCTX-M-55,tet(A)
C600-91	>=64	>=64	16	16	<=4	<=0.25	<=0.125	0.5	<=2	<=20	blaCTX-M-55
97	>=64	>=64	16	16	<=4	<=0.25	<=0.125	1	<=2	<=20	aac(3)-IId,aph(3'')-Ib,aph(6)-Id,blaCTX-M-55,blaEC-5,blaTEM-1,dfrA17,sul2,tet(34),tet(A)
C600-97	>=64	>=64	16	16	<=4	<=0.25	<=0.125	0.5	<=2	<=20	blaCTX-M-55
198	>=64	>=64	>=32	8	<=4	<=0.25	<=0.125	<=0.25	<=2	<=20	blaCTX-M-55,tet(34),tet(A)
C600-198	>=64	>=64	>=32	8	<=4	<=0.25	<=0.125	0.5	<=2	<=20	blaCTX-M-55
N56	>=64	>=64	16	8	<=4	<=0.25	<=0.125	1	<=2	<=20	aac(3)-IId,aph(3'')-Ib,aph(6)-Id,blaCTX-M-55,blaTEM-1,catA1,floR,qnrS1,sul2,tet(34),tet(A)
C600-N56	>=64	>=64	16	8	<=4	<=0.25	<=0.125	0.5	<=2	<=20	blaCTX-M-55
N106	>=64	>=64	16	8	<=4	<=0.25	<=0.125	1	<=2	>=320	aac(3)-IId,aadA5,aph(3'')-Ib,aph(6)-Id,blaCTX-M-55,dfrA17,mph(A),sul1,sul2,tet(A)
C600-N106	>=64	>=64	16	4	<=4	<=0.25	<=0.125	0.5	<=2	<=20	blaCTX-M-55
200	>=64	>=64	8	4	<=4	<=0.25	<=0.125	1	<=2	<=20	aac(3)-IId,aadA5,blaCTX-M-55,blaTEM-1,dfrA17,sul1
C600-200	>=64	>=64	8	4	<=4	<=0.25	<=0.125	0.5	<=2	40	blaCTX-M-55,blaTEM-1,sul1
122	>=64	>=64	16	8	<=4	<=0.25	<=0.125	<=0.25	<=2	>=320	aph(3'')-Ib,aph(6)-Id,blaCTX-M-55,blaTEM-1,dfrA14,sul2,tet(34)
C600-122	>=64	>=64	16	8	<=4	<=0.25	<=0.125	<=0.25	<=2	<=20	blaCTX-M-55
117	>=64	>=64	16	8	<=4	<=0.25	<=0.125	1	<=2	<=20	blaCTX-M-55,tet(34),tet(A)
C600-117	>=64	>=64	16	8	<=4	<=0.25	<=0.125	0.5	<=2	<=20	blaCTX-M-55
47	>=64	32	16	4	<=4	<=0.25	<=0.125	>=8	<=2	<=20	blaCTX-M-55,tet(34)
N39	>=64	>=64	16	16	<=4	<=0.25	<=0.125	4	<=2	>=320	blaCTX-M-55,blaTEM-135,dfrA14,floR,qnrS1,tet(A)
C600-N39	>=64	>=64	16	16	<=4	<=0.25	<=0.125	4	<=2	>=320	blaCTX-M-55,blaTEM-135,dfrA14,floR,qnrS1,tet(A)
126	32	16	1	8	<=4	<=0.25	<=0.125	2	<=2	>=320	aadA1,aph(3'')-Ib,aph(6)-Id,blaCTX-M-55,blaTEM-1,dfrA1,fosA3,sul1,sul2,tet(A)
C600-126	32	16	1	8	<=4	<=0.25	<=0.125	0.5	<=2	>=320	aadA1,blaCTX-M-55,blaTEM-1,dfrA1,fosA3
N5	>=64	>=64	16	8	<=4	<=0.25	<=0.125	4	<=2	>=320	aph(3'')-Ib,aph(6)-Id,blaCTX-M-55,blaTEM-1,dfrA14,floR,fosA3,qnrS1,sul2,tet(34),tet(A)
C600-N5	>=64	>=64	16	8	<=4	<=0.25	<=0.125	0.5	<=2	>=320	blaCTX-M-55,blaTEM-1,dfrA1,fosA3
98	>=64	16	4		<=4	<=0.25	<=0.125	>=8	<=2	>=320	aadA1,blaCTX-M-55,blaTEM-135,dfrA1,mph(A),sul1,tet(34),tet(A)
N113	>=64	32	8	16	8	<=0.25	<=0.125	>=8	<=2	>=320	aac(3)-IId,aadA1,aadA2,aph(3')-Ia,aph(3'')-Ib,aph(3')-IIa,aph(6)-Id,blaCTX-M-55,blaTEM-1,cmlA1,dfrA12,floR,mph(A),sul2,sul3,tet(34),tet(A),tet(M)
175	>=64	16	>=32		<=4	<=0.25	<=0.125	1	<=2	>=320	aac(3)-IId,aph(3')-Ia,aph(3'')-Ib,aph(6)-Id,blaCTX-M-55,blaTEM-150,dfrA14,floR,sul2,sul3,tet(A)
496	>=64	32	16	8	<=4	<=0.25	<=0.125	<=0.25	<=2	>=320	aph(3')-Ia,aph(3'')-Ib,aph(6)-Id,blaCTX-M-55,dfrA14,tet(34),tet(A)
N47	>=64	8	16	8	<=4	<=0.25	<=0.125	4	<=2	>=320	aac(3)-IId,aadA22,aph(3')-Ia,aph(6)-Id,arr-2,blaCTX-M-55,blaLAP-2,blaTEM-1,dfrA14,floR,lnu(F),mph(A),qnrS1,sul3,tet(34),tet(A)
N18	>=64	>=64	16	16	8	<=0.25	<=0.125	>=8	<=2	>=320	aph(3')-Ia,blaCTX-M-55,dfrA14,tet(34)
C600-N18	>=64	>=64	16	8	<=4	<=0.25	<=0.125	0.5	<=2	>=320	aph(3')-Ia,blaCTX-M-55,dfrA14
45	>=64	32	>=32		8	<=0.25	<=0.125	>=8	<=2	<=20	aadA5,aph(3'')-Ib,aph(6)-Id,aac(3)-IIa,blaCTX-M-55,blaCTX-M-14,blaTEM-1,dfrA17,erm(B),floR,mph(A),sul1,sul2,tet(A),tet(34)
C600-45	>=64	4	8	>=32	16	<=0.25	<=0.125	0.5	<=2	<=20	aph(3')-Ia,blaCTX-M-55,blaTEM-1
70	>=64	32	8	8	<=4	<=0.25	<=0.125	1	<=2	<=20	aadA5,aph(3'')-Ib,aph(6)-Id,blaCTX-M-55,dfrA17,qnrS1,sul2,tet(34),tet(A)
C600-70	>=64	32	16	8	<=4	<=0.25	<=0.125	0.5	<=2	<=20	blaCTX-M-55
"C600-*" represents transconjugant, which is on the next line of the donor strain. A total of 45 transconjugants carrying blaCTX-M-55 gene were obtained. CRO is ceftriaxone; CAZ is ceftazidime; FEP is cefepime; AMC is amoxicillin/clavulanic; TZP is piperacillin/tazobactam; ETP is ertapenem; IPM is imipenem; LVX is levofloxacin; AMK is amikacin; and SXT is compound sulfamethoxazole.
